# Supplementary material for: Reinspecting the Climate-Crop Yields Relationship at a Finer Scale and the Climate Damage Evaluation: Evidence from China
Source: Hindawi journal article supplement (doi:10.1155/2020/9424327), 2020-09-17
Supplement: f1 [file 9424327.f1.pdf]

## Supporting Information

**Table S1** Estimation of the climate-yield relationship for spring maize

| log(Y)             | Model_1   | Model_2    | Model_3    | Model_4    | Model_5     | Model_6   |
|--------------------|-----------|------------|------------|------------|-------------|-----------|
| c                  | 2.2566*** | 3.1491***  | 2.0742***  | 2.6624***  | 2.6220***   | 3.0321*** |
| log(F)             | 0.3492*** | 0.3901***  | 0.3553***  | 0.3746***  | 0.3730***   | 0.3926*** |
| gdd4               |           | 0.00047*   |            | 0.00048*   | 0.00045*    | 0.000363  |
| gdd5               |           | -0.00047*  |            | -0.00050*  | -0.00057**  | -0.000207 |
| gdd6               |           | -0.00064** |            | -0.000319  |             | -0.000402 |
| gdd7               |           | -0.00070** |            | -0.000217  |             | -0.000788 |
| gdd8               |           | -0.00067** |            | -0.00073** | -0.00091*** | -0.00063  |
| gdd9               |           | 0.000291   |            | 0.000328   |             |           |
| p4                 |           |            | 0.000224   | 0.000202   |             |           |
| p5                 |           |            | 0.000375   | 1.01E-04   |             |           |
| p6                 |           |            | 0.00127*** | 0.00100*** | 0.00122***  | 0.000268  |
| p7                 |           |            | 0.00067*** | 0.00055**  | 0.00062***  | 0.000504  |
| p8                 |           |            | 0.000118   | 7.13E-05   |             |           |
| p9                 |           |            | 0.000357   | 0.000424   |             |           |
| Adj R <sup>2</sup> | 0.7362    | 0.7607     | 0.7569     | 0.772      | 0.7752      | 0.7769    |
| AIC                | -1.4481   | -1.5329    | -1.5169    | -1.5581    | -1.5991     | -1.6041   |
| SC                 | -1.3206   | -1.3154    | -1.2994    | -1.2535    | -1.3961     | -1.4341   |

Note: \*\*\*/\*\*/\* indicate statistically significant at 1%, 5% and 10% level; all climate factors in Model\_6 are significant although the PCA method failed to present the significance level.

**Table S2** Estimation of the climate-yield relationship for summer maize

| log(Y)             | Model_1   | Model_2      | Model_3     | Model_4      | Model_5     |
|--------------------|-----------|--------------|-------------|--------------|-------------|
| c                  | 1.1077*** | 2.108***     | 0.966***    | 1.942***     | 1.6282***   |
| log(M)             | 0.1251*** | 0.1274***    | 0.141***    | 0.141***     | 0.1388***   |
| t                  | 0.0114*** | 0.0136***    | 0.0108***   | 0.013***     | 0.0125***   |
| gdd5               |           | -0.000856*** |             | -0.000914*** | -0.00089*** |
| gdd6               |           | -0.000494    |             | -0.000415    |             |
| gdd7               |           | -0.000609**  |             | -0.000347    | -0.00048*   |
| gdd8               |           | -0.000149    |             | -0.000035    |             |
| gdd9               |           | -0.000137    |             | -0.000443    |             |
| p5                 |           |              | 0.000258    | 0.000011     |             |
| p6                 |           |              | 0.000341*** | 0.000288**   | 0.0003***   |
| p7                 |           |              | 0.00028***  | 0.000195*    | 0.000205*   |
| p8                 |           |              | 0.000135    | 0.000098     |             |
| p9                 |           |              | -0.000283*  | -0.00041**   | -0.000293*  |
| Adj R <sup>2</sup> | 0.7088    | 0.7237       | 0.7219      | 0.731        | 0.7314      |
| AIC                | -0.9085   | -0.9386      | -0.9341     | -0.9553      | -0.9669     |
| SC                 | -0.7529   | -0.7344      | -0.7302     | -0.7067      | -0.7627     |

Note: since Model\_5 has kept in model all significant climate factors that were identified in Model\_2 and Model\_3, it need not to apply the PCA method. And accordingly, the Model\_5 for summer maize was used to estimate its climate-induced losses.

**Table S3** Estimation of the climate-yield relationship for winter wheat

| log(Y)             | Model_1  | Model_2      | Model_3     | Model_4      | Model_5      | Model_6   |
|--------------------|----------|--------------|-------------|--------------|--------------|-----------|
| c                  | 1.308*** | 1.394***     | 1.272***    | 1.440***     | 1.321***     | 1.674***  |
| log(F)             | 0.197*** | 0.194***     | 0.198***    | 0.199***     | 0.198***     | 0.211***  |
| log(M)             | 0.143*** | 0.148***     | 0.142***    | 0.144***     | 0.139***     | 0.145***  |
| gdd9               |          | -0.000534*   |             | -0.000535*   |              | -0.000363 |
| gdd10              |          | 0.000238     |             | 0.000279     |              |           |
| gdd11              |          | -0.000325    |             | -1.68E-04    |              |           |
| gdd12              |          | 6.42E-06     |             | 3.19E-04     |              |           |
| gdd1               |          | -0.001761*** |             | -0.001574**  | -0.001787*** | -0.002166 |
| gdd2               |          | -0.000373    |             | -0.000145    |              |           |
| gdd3               |          | -7.88E-05    |             | 7.74E-05     |              |           |
| gdd4               |          | 0.000228     |             | 0.000324     |              |           |
| gdd5               |          | -0.000323    |             | -0.000568*   |              | -0.000415 |
| gdd6               |          | 0.000453     |             | 0.000382     |              |           |
| p9                 |          |              | 0.000696*** | 0.00049**    | 0.000581***  | 0.000452  |
| p10                |          |              | 0.000555**  | 0.000545*    |              | 0.000295  |
| p11                |          |              | 6.21E-06    | 2.91E-05     |              |           |
| p12                |          |              | -0.000921*  | -0.001429*** | -0.001274*** | -0.000745 |
| p1                 |          |              | -0.000236   | -3.03E-04    |              |           |
| p2                 |          |              | 7.81E-05    | -1.45E-04    |              |           |
| p3                 |          |              | 0.000289    | 0.000271     |              |           |
| p4                 |          |              | -0.000513*  | -0.000269    |              | -0.000318 |
| p5                 |          |              | 0.000132    | -5.39E-05    |              |           |
| p6                 |          |              | -0.000163   | -9.19E-05    |              |           |
| Adj R <sup>2</sup> | 0.8656   | 0.8661       | 0.8684      | 0.8698       | 0.8701       | 0.8714    |
| AIC                | -0.8091  | -0.8090      | -0.8264     | -0.8195      | -0.8514      | -0.8598   |
| SC                 | -0.6352  | -0.5492      | -0.5665     | -0.4785      | -0.6484      | -0.6486   |

Note: \*\*\*/\*\*/\* indicate statistically significant at 1%, 5% and 10% level; all climate factors in Model\_6 are significant although the PCA method failed to present the significance level.

**Table S4** Estimation of the climate-yield relationship for spring wheat

| log(Y)             | Model_1  | Model_2     | Model_3   | Model_4     | Model_5      | Model_6   |
|--------------------|----------|-------------|-----------|-------------|--------------|-----------|
| c                  | 1.885*** | 2.301***    | 1.818***  | 2.516***    | 2.444***     | 2.476***  |
| log(F)             | 0.392*** | 0.437***    | 0.393***  | 0.449***    | 0.441***     | 0.453***  |
| gdd3               |          | -0.001729   |           | -0.001891*  |              | -0.0013   |
| gdd4               |          | 0.000118    |           | 0.000076    |              |           |
| gdd5               |          | 0.000279    |           | 0.00072     |              |           |
| gdd6               |          | -0.000884** |           | -0.001265** | -0.001272*** | -0.001226 |
| gdd7               |          | -0.000096   |           | -0.000452   |              |           |
| p3                 |          |             | 0.001874  | 0.001311    |              |           |
| p4                 |          |             | 0.001085  | 0.001257    |              |           |
| p5                 |          |             | 0.000759  | 0.001757*   | 0.001543**   | 0.001077  |
| p6                 |          |             | 0.000911* | -0.000325   |              |           |
| p7                 |          |             | -0.000439 | -0.000641   |              |           |
| Adj R <sup>2</sup> | 0.7315   | 0.7380      | 0.7329    | 0.7429      | 0.7454       | 0.7487    |
| AIC                | -1.1480  | -1.1437     | -1.1241   | -1.1344     | -1.1895      | -1.2086   |
| SC                 | -1.0141  | -0.9140     | -0.8944   | -0.8090     | -1.0172      | -1.0555   |

Note: \*\*\*/\*\*/\* indicate statistically significant at 1%, 5% and 10% level; all climate factors in Model\_6 are significant although the PCA method failed to present the significance level.

**Table S5** Comparison with the robust estimates of climate-yield relationship for  
spring maize

| log(Y) | Model_2               | Model_2_r             | Model_2_b             | Model_3               | Model_3_r             | Model_3_b             |
|--------|-----------------------|-----------------------|-----------------------|-----------------------|-----------------------|-----------------------|
| c      | 3.14914***<br>(15.83) | 3.14914***<br>(11.18) | 3.14914***<br>(12.82) | 2.07417***<br>(43.11) | 2.07417***<br>(26.54) | 2.07417***<br>(21.83) |
| log(F) | 0.39009***<br>(16.88) | 0.39009***<br>(8.75)  | 0.39009***<br>(9.49)  | 0.35535***<br>(19.62) | 0.35535***<br>(8.75)  | 0.35535***<br>(9.94)  |
| gdd4   | 0.00047*<br>(1.84)    | 0.00047***<br>(3.53)  | 0.00047***<br>(3.42)  |                       |                       |                       |
| gdd5   | -0.00047*<br>(-1.92)  | -0.00047<br>(-1.19)   | -0.00047<br>(-1.29)   |                       |                       |                       |
| gdd6   | -0.00064**<br>(-2.41) | -0.00064**<br>(-2.46) | -0.00064**<br>(-2.56) |                       |                       |                       |
| gdd7   | -0.0007**<br>(-2.12)  | -0.0007**<br>(-2.06)  | -0.0007**<br>(-2.32)  |                       |                       |                       |
| gdd8   | -0.00067**<br>(-1.98) | -0.00067<br>(-1.57)   | -0.00067*<br>(-1.69)  |                       |                       |                       |
| gdd9   | 0.00029<br>(0.98)     | 0.00029<br>(0.79)     | 0.00029<br>(0.80)     |                       |                       |                       |
| p4     |                       |                       |                       | 0.00022<br>(0.35)     | 0.00022<br>(0.44)     | 0.00022<br>(0.48)     |
| p5     |                       |                       |                       | 0.00038<br>(0.91)     | 0.00038<br>(0.76)     | 0.00038<br>(0.83)     |
| p6     |                       |                       |                       | 0.00126***<br>(4.06)  | 0.00126***<br>(4.02)  | 0.00126***<br>(4.20)  |
| p7     |                       |                       |                       | 0.00067***<br>(3.06)  | 0.00067***<br>(2.87)  | 0.00067**<br>(2.51)   |
| p8     |                       |                       |                       | 0.00012<br>(0.58)     | 0.00012<br>(0.35)     | 0.00012<br>(0.29)     |
| p9     |                       |                       |                       | 0.00036<br>(1.05)     | 0.00036<br>(1.53)     | 0.00036<br>(1.42)     |

Note: Model\_2 and Model\_3 are the origin model in table S1, and the suffix \_r and \_b represent the estimates with robust and bootstrap techniques. The comparison indicates that the effect of GDD4 on spring maize yield becomes more significant, while the effects of GDD5, GDD8 and P7 become less significant.

**Table S6** Comparison with the robust estimates of climate-yield relationship for  
summer maize

| log(Y) | Model_2                | Model_2_r              | Model_2_b              | Model_3               | Model_3_r             | Model_3_b            |
|--------|------------------------|------------------------|------------------------|-----------------------|-----------------------|----------------------|
| c      | 2.10805***<br>(8.30)   | 2.10805***<br>(7.03)   | 2.10805***<br>(7.09)   | 0.96598***<br>(21.67) | 0.96598***<br>(12.92) | 0.96598***<br>(9.99) |
| log(M) | 0.12744***<br>(3.00)   | 0.12744<br>(1.10)      | 0.12744<br>(0.92)      | 0.14094***<br>(3.33)  | 0.14094<br>(1.17)     | 0.14094<br>(1.07)    |
| t      | 0.01359***<br>(5.67)   | 0.01359**<br>(2.05)    | 0.01359*<br>(1.70)     | 0.01081***<br>(4.59)  | 0.01081<br>(1.53)     | 0.01081<br>(1.36)    |
| gdd5   | -0.00086***<br>(-3.26) | -0.00086***<br>(-3.44) | -0.00086***<br>(-3.53) |                       |                       |                      |
| gdd6   | -0.00049<br>(-1.50)    | -0.00049**<br>(-2.11)  | -0.00049**<br>(-2.16)  |                       |                       |                      |
| gdd7   | -0.00061**<br>(-1.99)  | -0.00061**<br>(-2.01)  | -0.00061**<br>(-2.07)  |                       |                       |                      |
| gdd8   | -0.00015<br>(-0.47)    | -0.00015<br>(-0.63)    | -0.00015<br>(-0.63)    |                       |                       |                      |
| gdd9   | -0.00014<br>(-0.46)    | -0.00014<br>(-0.53)    | -0.00014<br>(-0.54)    |                       |                       |                      |
| p5     |                        |                        |                        | 0.00026<br>(1.54)     | 0.00026<br>(1.26)     | 0.00026<br>(1.27)    |
| p6     |                        |                        |                        | 0.00034***<br>(3.15)  | 0.00034***<br>(3.47)  | 0.00034***<br>(3.35) |
| p7     |                        |                        |                        | 0.00028***<br>(2.75)  | 0.00028*<br>(1.87)    | 0.00028**<br>(2.00)  |
| p8     |                        |                        |                        | 0.00013<br>(1.12)     | 0.00013<br>(1.06)     | 0.00013<br>(1.19)    |
| p9     |                        |                        |                        | -0.00028*<br>(-1.67)  | -0.00028<br>(-1.46)   | -0.00028<br>(-1.41)  |

Note: Model\_2 and Model\_3 are the origin model in table S2, and the suffix \_r and \_b represent the estimates with robust and bootstrap techniques. The comparison indicates that the effect of GDD6 on summer maize yield becomes significant, while the effect of P7 becomes less significant.

**Table S7** Comparison with the robust estimates of climate-yield relationship for  
winter wheat

| log(Y) | Model_2                | Model_2_r              | Model_2_b              | Model_3               | Model_3_r             | Model_3_b            |
|--------|------------------------|------------------------|------------------------|-----------------------|-----------------------|----------------------|
| c      | 1.39440***<br>(6.10)   | 1.39440***<br>(4.92)   | 1.39440***<br>(4.87)   | 1.27188***<br>(14.49) | 1.27188***<br>(8.26)  | 1.27188***<br>(6.70) |
| log(F) | 0.19388***<br>(5.71)   | 0.19388***<br>(2.93)   | 0.19388***<br>(2.86)   | 0.19761***<br>(6.11)  | 0.19761***<br>(2.87)  | 0.19761***<br>(2.99) |
| log(M) | 0.14792***<br>(5.40)   | 0.14792**<br>(2.57)    | 0.14792**<br>(2.51)    | 0.14170***<br>(5.30)  | 0.14170***<br>(2.58)  | 0.14170***<br>(2.65) |
| gdd9   | -0.00053*<br>(-1.87)   | -0.00053<br>(-1.58)    | -0.00053*<br>(-1.65)   |                       |                       |                      |
| gdd10  | 0.00024<br>(0.90)      | 0.00024<br>(1.63)      | 0.00024*<br>(1.65)     |                       |                       |                      |
| gdd11  | -0.00033<br>(-1.10)    | -0.00033<br>(-1.18)    | -0.00033<br>(-1.20)    |                       |                       |                      |
| gdd12  | 0.00001<br>(0.01)      | 0.00001<br>(0.02)      | 0.00001<br>(0.02)      |                       |                       |                      |
| gdd1   | -0.00176***<br>(-2.66) | -0.00176***<br>(-4.63) | -0.00176***<br>(-3.97) |                       |                       |                      |
| gdd2   | -0.00037<br>(-1.11)    | -0.00037***<br>(-2.60) | -0.00037**<br>(-2.47)  |                       |                       |                      |
| gdd3   | -0.00008<br>(-0.28)    | -0.00008<br>(-0.32)    | -0.00008<br>(-0.31)    |                       |                       |                      |
| gdd4   | 0.00023<br>(1.03)      | 0.00023*<br>(1.64)     | 0.00023*<br>(1.71)     |                       |                       |                      |
| gdd5   | -0.00032<br>(-1.29)    | -0.00032<br>(-0.72)    | -0.00032<br>(-0.75)    |                       |                       |                      |
| gdd6   | 0.00045<br>(1.49)      | 0.00045<br>(0.77)      | 0.00045<br>(0.84)      |                       |                       |                      |
| p9     |                        |                        |                        | 0.00070***<br>(3.46)  | 0.00070***<br>(2.86)  | 0.00070***<br>(2.80) |
| p10    |                        |                        |                        | 0.00056**<br>(2.05)   | 0.00056**<br>(2.09)   | 0.00056**<br>(2.22)  |
| p11    |                        |                        |                        | 0.00<br>(0.02)        | 0.00<br>(0.03)        | 0.00<br>(0.03)       |
| p12    |                        |                        |                        | -0.00092*<br>(-1.89)  | -0.00092**<br>(-2.33) | -0.00092<br>(-1.64)  |
| p1     |                        |                        |                        | -0.00024<br>(-0.55)   | -0.00024<br>(-0.65)   | -0.00024<br>(-0.42)  |
| p2     |                        |                        |                        | 0.00008<br>(0.18)     | 0.00008<br>(0.16)     | 0.00008<br>(0.14)    |
| p3     |                        |                        |                        | 0.00029<br>(1.05)     | 0.00029<br>(1.25)     | 0.00029<br>(1.10)    |
| p4     |                        |                        |                        | -0.00051*<br>(-1.89)  | -0.00051*<br>(-2.33)  | -0.00051<br>(-1.64)  |

|    |          |           |          |
|----|----------|-----------|----------|
|    | (-1.66)  | (-1.78)   | (-1.52)  |
| p5 | 0.00013  | 0.00013   | 0.00013  |
|    | (0.58)   | (0.60)    | (0.60)   |
| p6 | -0.00016 | -0.00016* | -0.00016 |
|    | (-1.23)  | (-1.69)   | (-1.61)  |

---

Note: Model\_2 and Model\_3 are the origin model in table S3, and the suffix \_r and \_b represent the estimates with robust and bootstrap techniques. The comparison indicates that the effects of GDD10, GDD2 and GDD4 on winter wheat yield becomes significant, while the negative effect of P12 becomes insignificant in the bootstrap estimate.



**Table S8** Comparison with the robust estimates of climate-yield relationship for  
spring wheat

| log(Y) | Model_2               | Model_2_r             | Model_2_b             | Model_3               | Model_3_r             | Model_3_b             |
|--------|-----------------------|-----------------------|-----------------------|-----------------------|-----------------------|-----------------------|
| c      | 2.30130***<br>(7.28)  | 2.30130***<br>(10.06) | 2.30130***<br>(10.23) | 1.81773***<br>(24.06) | 1.81773***<br>(15.80) | 1.81773***<br>(19.22) |
| log(F) | 0.43662***<br>(12.45) | 0.43662***<br>(9.93)  | 0.43662***<br>(9.51)  | 0.39291***<br>(15.89) | 0.39291***<br>(9.33)  | 0.39291***<br>(8.76)  |
| gdd3   | -0.00173<br>(-1.54)   | -0.00173<br>(-1.33)   | -0.00173<br>(-1.21)   |                       |                       |                       |
| gdd4   | 0.00012<br>(0.37)     | 0.00012<br>(0.51)     | 0.00012<br>(0.52)     |                       |                       |                       |
| gdd5   | 0.00028<br>(0.73)     | 0.00028<br>(0.83)     | 0.00028<br>(0.97)     |                       |                       |                       |
| gdd6   | -0.00088**<br>(-2.12) | -0.00088**<br>(-2.26) | -0.00088**<br>(-2.29) |                       |                       |                       |
| gdd7   | -0.0001<br>(-0.20)    | -0.0001<br>(-0.21)    | -0.0001<br>(-0.25)    |                       |                       |                       |
| p3     |                       |                       |                       | 0.00187<br>(0.74)     | 0.00187<br>(0.77)     | 0.00187<br>(0.76)     |
| p4     |                       |                       |                       | 0.00109<br>(0.74)     | 0.00109<br>(0.61)     | 0.00109<br>(0.65)     |
| p5     |                       |                       |                       | 0.00076<br>(0.95)     | 0.00076<br>(0.62)     | 0.00076<br>(0.69)     |
| p6     |                       |                       |                       | 0.00091*<br>(1.72)    | 0.00091<br>(0.65)     | 0.00091<br>(0.68)     |
| p7     |                       |                       |                       | -0.00044<br>(-0.88)   | -0.00044<br>(-0.67)   | -0.00044<br>(-0.73)   |

Note: Model\_2 and Model\_3 are the origin model in table S4, and the suffix \_r and \_b represent the estimates with robust and bootstrap techniques. The comparison indicates that the effects of climate variables on spring wheat yield are relative stable, except for the effect of P6 which becomes insignificant in the robust and bootstrap estimates.
